# Supplementary material
Source: PubMed Central journal article supplement (PMC7311311)
Supplement: NIHMS1585902-supplement-1.pdf [file NIHMS1585902-supplement-1.pdf]

**Supplemental Table S1: Fit Indices for Each of the Hypothesized Models**

| Model Number | Hypothesized Factors                                                   | A. Anger | B. Anxiety | C. Depression | D. Social Isolation | E. Sleep Disturbance | F. Fatigue | G. Ability to Participate SRA | H. Satisfaction with SRA | I. Emotional Support | J. Informational Support | K. Feelings of Loss-Self | L. Feelings of Loss-Person with TBI | M. Feeling Trapped | N. Caregiver-Specific Anxiety | O. Caregiver Strain | RMSEA ( $\leq .08$ ) | CFI ( $\geq .95$ ) | TLI ( $\geq .95$ ) | CMIN/DF ( $\leq 3$ ) | Absolute AIC (< better) | Baseline (Mode 1) - Model AIC ( $\geq 3$ clinically meaningful) |
|--------------|------------------------------------------------------------------------|----------|------------|---------------|---------------------|----------------------|------------|-------------------------------|--------------------------|----------------------|--------------------------|--------------------------|-------------------------------------|--------------------|-------------------------------|---------------------|----------------------|--------------------|--------------------|----------------------|-------------------------|-----------------------------------------------------------------|
| 1            | One-Factor HRQOL (Baseline Model)                                      | •        | •          | •             | •                   | •                    |            | •                             | •                        | •                    | •                        | •                        | •                                   | •                  | •                             | •                   | 0.13                 | 0.91               | 0.88               | 9.90                 | 663.70                  | 0                                                               |
| 2            | HRQOL                                                                  | •        | •          | •             | •                   | •                    | •          | •                             | •                        |                      |                          | •                        | •                                   | •                  | •                             | •                   | 0.11                 | 0.92               | 0.90               | 7.56                 | 707.40                  | 43.70                                                           |
|              | Social                                                                 |          |            |               |                     |                      |            |                               |                          | •                    | •                        |                          |                                     |                    |                               |                     |                      |                    |                    |                      |                         |                                                                 |
| 3            | HRQOL, Social                                                          | •        | •          | •             | •                   | •                    | •          | •                             | •                        | •                    | •                        |                          |                                     |                    |                               |                     | 0.08                 | 0.95               | 0.94               | 4.84                 | 470.03                  | -193.67                                                         |
|              | Emotional Health (Feeling Loss, Trapped, Caregiver Anxiety and Strain) |          |            |               |                     |                      |            |                               |                          |                      |                          | •                        | •                                   | •                  | •                             | •                   |                      |                    |                    |                      |                         |                                                                 |
| 4            | Generic HRQOL                                                          | •        | •          | •             | •                   | •                    | •          | •                             | •                        |                      |                          |                          |                                     |                    |                               |                     | 0.10                 | 0.94               | 0.92               | 5.93                 | 570.09                  | -93.61                                                          |
|              | Emotional Health (Feeling Loss, Trapped, Caregiver Anxiety and Strain) |          |            |               |                     |                      |            |                               |                          |                      |                          | •                        | •                                   | •                  | •                             | •                   |                      |                    |                    |                      |                         |                                                                 |
|              | Social Health                                                          |          |            |               |                     |                      |            |                               |                          | •                    | •                        |                          |                                     |                    |                               |                     |                      |                    |                    |                      |                         |                                                                 |
| 5            | Emotional Health (Negative Affect, Feeling Loss, Trapped and Strain)   | •        | •          | •             |                     |                      |            |                               |                          |                      |                          | •                        | •                                   | •                  | •                             | •                   | 0.09                 | 0.95               | 0.94               | 5.06                 | 487.66                  | -176.04                                                         |
|              | Social Participation and Support                                       |          |            |               | •                   |                      |            | •                             | •                        | •                    |                          |                          |                                     |                    |                               |                     |                      |                    |                    |                      |                         |                                                                 |
|              | Physical Health                                                        |          |            |               |                     | •                    | •          |                               |                          |                      |                          |                          |                                     |                    |                               |                     |                      |                    |                    |                      |                         |                                                                 |
| 6            | Emotional Health (Negative Affect,                                     | •        | •          | •             |                     |                      |            |                               |                          |                      |                          | •                        | •                                   | •                  | •                             | •                   | 0.10                 | 0.93               | 0.91               | 6.80                 | 623.87                  | -39.83                                                          |
